# Supplementary material for: A Pilot Study to Examine Exposure to Residential Radon in Under-Sampled Census Tracts of DeKalb County, Georgia, in 2015
Source: MDPI journal article supplement (doi:10.3390/ijerph14030332), 2017-03-22
Supplement: s1 [file s1]

# Supplementary Materials: A Pilot Study to Examine Exposure to Residential Radon in Under-Sampled Census Tracts of DeKalb County, Georgia, in 2015

Christine Stauber \*, Dajun Dai, Sydney Chan, Jeremy Diem, Scott Weaver and Richard Rothenberg

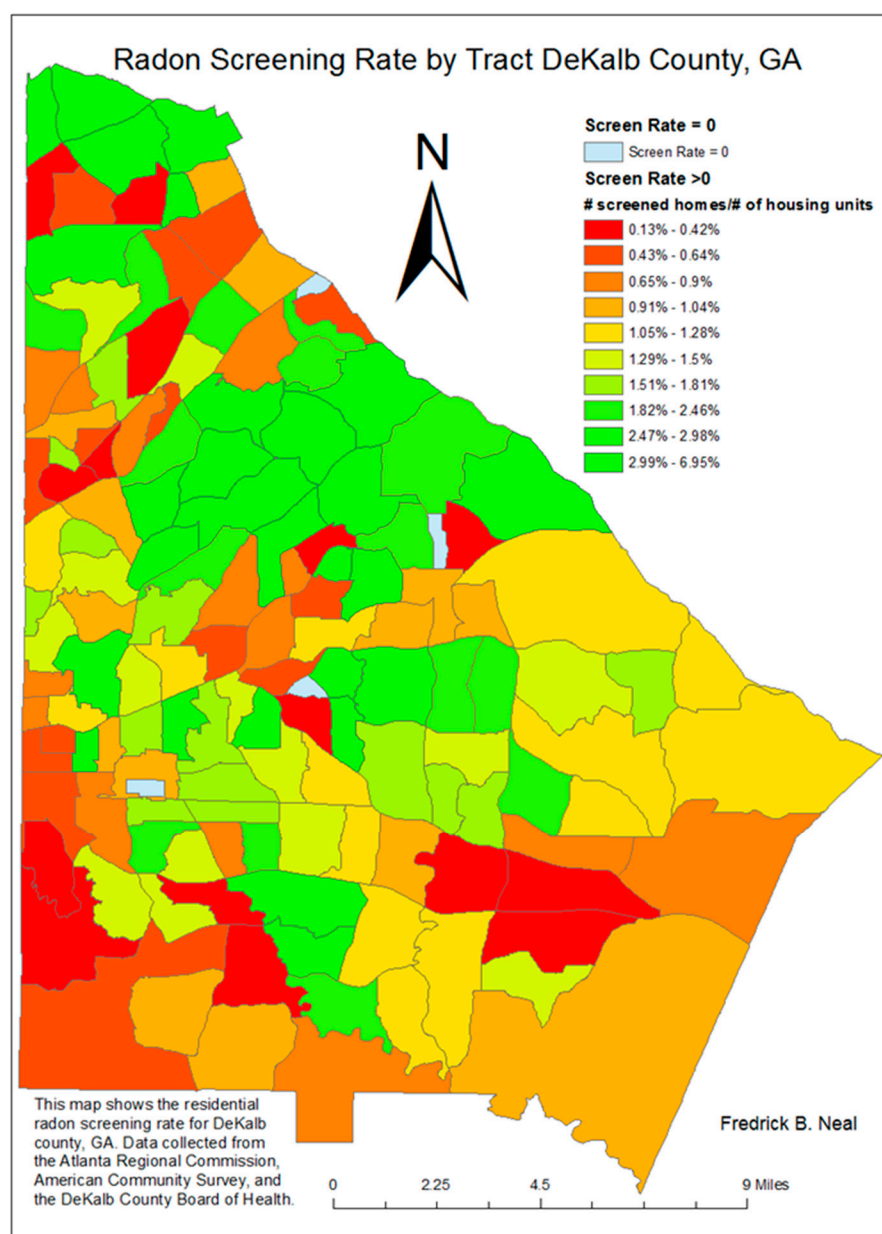

**Figure S1.** Radon screening prevalence in DeKalb County, GA.

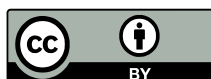

© 2017 by the authors; licensee MDPI, Basel, Switzerland. This article is an open access article distributed under the terms and conditions of the Creative Commons by Attribution (CC-BY) license (<http://creativecommons.org/licenses/by/4.0/>).
